# Supplementary material
Source: HighWire-hosted journal article supplement (https://mbio.asm.org/content/5/4/e01494-14)
Supplement: inline-supplementary-material-1 [file inline-supplementary-material-1.pdf]

## Supplemental Table 1

| Accession | Mutation Type        | Closest yeast protein | Predicted function            |
|-----------|----------------------|-----------------------|-------------------------------|
| CNBG_0103 | Missense(Q->E)       | Aro1                  | Aromatic amino acid synthesis |
| CNBG_0538 | Missense(S->P)       | Msm1                  | Methionyl-tRNA synthetase     |
| CNBG_0605 | Missense(D->G)       |                       |                               |
| CNBG_0776 | Splice site acceptor |                       | Haloacid hydrolase            |
| CNBG_0907 | Missense(G->D)       | Mcx1                  | Mitochondrial ATPase          |
| CNBG_1161 | Frame shift          | Msh2                  | Mismatch repair               |
| CNBG_1222 | Synonymous           | Nop13                 | RNA-binding                   |
| CNBG_1894 | Missense(L->V)       | Rom1                  | RhoGEF                        |
| CNBG_2540 | Missense(A->V)       | Ubx7                  | UBX domain                    |
| CNBG_2807 | Missense(L->P)       |                       |                               |
| CNBG_3034 | Missense(H->Y)       |                       | BRCT domain                   |
| CNBG_3430 | Missense(A->E)       | Put3                  | Fungal transcription factor   |
| CNBG_3547 | Synonymous           | Smd3                  | Splicing                      |
| CNBG_4876 | Missense(L->S)       | YJL068C               | Esterase                      |
| CNBG_5437 | Missense(P->L)       | Fpk1                  | Phototropin-like kinase       |
| CNBG_5544 | Missense(M->T)       | Mus81                 | Nuclease                      |
