# Supplementary material
Source: HighWire-hosted journal article supplement (https://mbio.asm.org/content/5/4/e01494-14)
Supplement: inline-supplementary-material-3 [file inline-supplementary-material-3.pdf]

**CNBG\_4871**

Polymorphic amino acid positions

| Protein haplotypes | 38 | 204 | 215 | 248 | 265 | 377 | 539 | 600 | 637 | 640 | 977 | 1008 | 1211 | 1350 | 1364 | 1488 | 1493 |
|--------------------|----|-----|-----|-----|-----|-----|-----|-----|-----|-----|-----|------|------|------|------|------|------|
| VGIV               | K  | P   | E   | Y   | K   | N   | D   | L   | I   | I   | V   | A    | E    | T    | R    | G    | I    |
| VGI                | K  | S   | E   | Y   | K   | N   | D   | L   | I   | I   | V   | V    | E    | R    | K    | E    | I    |
| VGI                | K  | P   | E   | Y   | K   | N   | D   | L   | I   | I   | V   | A    | E    | R    | R    | G    | I    |
| VGIII              | K  | S   | E   | Y   | K   | N   | D   | L   | I   | I   | V   | A    | E    | R    | R    | E    | T    |
| VGIII              | K  | S   | E   | Y   | R   | S   | D   | L   | I   | I   | V   | A    | E    | R    | R    | E    | T    |
| VGIII              | K  | S   | G   | Y   | R   | S   | D   | L   | I   | I   | V   | A    | E    | R    | R    | E    | T    |
| <b>VGII</b>        | R  | S   | E   | N   | K   | N   | N   | F   | I   | I   | V   | A    | D    | R    | R    | E    | T    |
| VGII               | R  | S   | E   | N   | K   | N   | N   | L   | I   | I   | I   | A    | E    | R    | R    | E    | I    |
| VGII               | R  | S   | E   | N   | K   | N   | N   | L   | V   | I   | I   | A    | E    | R    | R    | E    | I    |
| VGII               | R  | S   | E   | N   | K   | N   | N   | L   | V   | T   | I   | A    | E    | R    | R    | E    | I    |

**CNBG\_4872**

Polymorphic amino acid positions

| Protein haplotypes | 28 | 84 | 318 | 332 | 410 | 427 | 534 | 601 | 713 | 736 | 974 | 1018 | 1021 | 1145 | 1193 | 1206 | 1241 | 1354 | 1361 | 1399 | 1501 | 1503 | 1508 | 1538 | 1543 |
|--------------------|----|----|-----|-----|-----|-----|-----|-----|-----|-----|-----|------|------|------|------|------|------|------|------|------|------|------|------|------|------|
| VGIV               | L  | R  | P   | S   | D   | E   | E   | P   | P   | N   | T   | A    | S    | T    | G    | Y    | D    | D    | V    | R    | K    | M    | T    | G    | M    |
| VGIII              | S  | G  | P   | T   | E   | E   | E   | S   | P   | N   | T   | A    | S    | A    | D    | N    | E    | D    | V    | R    | K    | M    | R    | G    | T    |
| VGIII              | S  | G  | P   | T   | E   | K   | E   | S   | P   | N   | T   | A    | S    | A    | D    | N    | E    | D    | V    | R    | K    | M    | R    | G    | T    |
| VGI                | S  | G  | P   | T   | E   | E   | E   | S   | A   | N   | T   | A    | F    | A    | D    | N    | E    | D    | V    | T    | K    | M    | R    | E    | T    |
| VGI                | S  | G  | P   | T   | E   | E   | E   | S   | A   | N   | T   | A    | F    | A    | D    | N    | E    | D    | V    | R    | K    | M    | R    | E    | T    |
| <b>VGII</b>        | S  | G  | L   | T   | E   | E   | D   | S   | P   | N   | T   | A    | S    | A    | D    | N    | E    | G    | V    | R    | K    | T    | R    | G    | T    |
| VGII               | S  | G  | P   | T   | E   | E   | E   | S   | P   | T   | T   | P    | S    | A    | D    | N    | E    | D    | M    | R    | K    | M    | R    | G    | T    |
| VGII               | S  | R  | P   | T   | E   | E   | E   | S   | P   | N   | T   | P    | S    | A    | D    | N    | E    | D    | V    | R    | E    | M    | R    | G    | T    |
| VGII               | S  | G  | P   | T   | E   | E   | E   | S   | P   | N   | T   | P    | S    | A    | D    | N    | E    | D    | M    | R    | K    | M    | R    | G    | T    |
| VGII               | S  | G  | P   | T   | E   | E   | E   | S   | P   | N   | I   | P    | S    | A    | D    | N    | E    | D    | M    | R    | K    | M    | R    | G    | T    |
| VGII               | S  | R  | P   | T   | E   | E   | E   | S   | P   | N   | T   | P    | S    | A    | D    | N    | E    | D    | V    | R    | E    | M    | R    | G    | T    |
| VGII               | S  | R  | P   | T   | E   | E   | E   | S   | P   | N   | I   | P    | S    | A    | D    | N    | E    | D    | V    | R    | E    | M    | R    | G    | T    |

**CNBG\_4873**

Polymorphic amino acid positions

| Protein haplotypes | 12 | 44 | 143 | 155 | 354 | 456 | 468 | 507 | 552 |
|--------------------|----|----|-----|-----|-----|-----|-----|-----|-----|
| VGIV               | G  | S  | R   | V   | T   | P   | I   | S   | D   |
| VGIII              | V  | P  | R   | V   | T   | P   | T   | S   | N   |
| VGI                | G  | P  | R   | V   | T   | P   | T   | S   | N   |
| <b>VGII</b>        | G  | R  | H   | V   | A   | P   | T   | S   | N   |
| VGII               | G  | P  | R   | L   | T   | P   | T   | P   | D   |
| VGII               | G  | P  | R   | L   | T   | S   | T   | P   | D   |
